# Supplementary material for: Real-world emission characteristics of VOCs from typical cargo ships and their potential contributions to secondary organic aerosol and O 3 under low-sulfur fuel policies
Source: Copernicus journal article supplement (doi:10.5194/acp-24-8999-2024), 2024-08-16
Supplement: Supplementary file 1 [file acp-24-8999-2024-supplement.pdf]

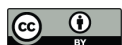

*Supplement of*

**Real-world emission characteristics of VOCs from typical cargo ships and their potential contributions to secondary organic aerosol and O<sub>3</sub> under low-sulfur fuel policies**

**Fan Zhang et al.**

*Correspondence to:* Yan Zhang ([yan\\_zhang@fudan.edu.cn](mailto:yan_zhang@fudan.edu.cn)) and Gehui Wang ([ghwang@geo.ecnu.edu.cn](mailto:ghwang@geo.ecnu.edu.cn))

The copyright of individual parts of the supplement might differ from the article licence.

7

Table S1 Characteristics of the fuels used in the test ships

|                                                | Unit                | Detection limit | CCS1 /HFO | CCS1 /diesel | CCS2 /diesel | OGV1 /HFO | OGV1 /diesel | OGV2 /HFO | OGV2 /diesel | OGV3 /HFO | OGV3 /diesel | ICS /diesel |
|------------------------------------------------|---------------------|-----------------|-----------|--------------|--------------|-----------|--------------|-----------|--------------|-----------|--------------|-------------|
| Gross calorific value                          | MJ kg <sup>-1</sup> |                 |           |              |              | 44.21     | 45.76        | 42.62     | 45.72        | 43.08     | 45.64        |             |
| Net calorific value                            | MJ kg <sup>-1</sup> |                 |           |              |              | 41.45     | 42.75        | 40.28     | 42.71        | 40.61     | 42.66        |             |
| Kinematic viscosity (50°C), mm <sup>2</sup> /s |                     |                 |           |              |              | 44.04     |              |           |              |           |              |             |
| Kinematic viscosity (40°C), mm <sup>2</sup> /s |                     |                 |           |              |              |           |              |           |              |           |              |             |
| Kinematic viscosity (20°C), mm <sup>2</sup> /s |                     |                 | 6.3       | 105          |              |           | 5.216        | 152.3     | 4.724        | 161.1     | 5.363        |             |
| Moisture                                       | %m                  |                 | N.D.      | 0.35         |              | 0.03      | N.D.         | 0.09      | N.D.         | 0.12      | N.D.         |             |
| Ash                                            | %m                  |                 | 0.008     | 0.035        |              |           |              |           |              |           |              |             |
| Sulfur (S)                                     | %m                  | 0.01            | 0.39      | N.D.         | N.D.         | 0.50      | 0.03         | 0.43      | 0.02         | 0.43      | 0.05         | N.D.        |
| Carbon (C)                                     | %m                  | 0.30            | 86.95     | 85.5         | 85.82        | 86.62     | 80.80        | 82.4      | 79.6         | 69.9      | 66.5         | 85.5        |
| Hydrogen (H)                                   | %m                  | 0.30            | 10.58     | 12.83        | 13.2         | 11.33     | 8.15         | 9.68      | 12.3         | 11.3      | 10.61        |             |
| Nitrogen (N)                                   | %m                  | 0.30            | 0.59      | N.D.         | N.D.         | N.D.      | N.D.         | 0.39      | N.D.         | 2.36      | N.D.         |             |
| Oxygen (O)                                     | %m                  | 0.30            | N.D.      | N.D.         | 2.26         | 0.36      | N.D.         | 1.53      | 0.59         | 1.34      | 0.73         |             |
| Vanadium (V)                                   | mg kg <sup>-1</sup> | 0.05            | 5.41      | N.D.         | N.D.         |           |              | N.D.      | 0.20         | 4.00      | N.D.         |             |
| Nickel (Ni)                                    | mg kg <sup>-1</sup> | 0.01            | 18.91     | N.D.         | N.D.         |           |              | 16.0      | 0.10         | 15.0      | N.D.         |             |
| Sodium (Na)                                    | mg kg <sup>-1</sup> | 0.10            | 3.08      | 0.339        | 0.467        |           |              | 6.00      | 0.10         | 8.00      | 0.10         |             |
| Lead (Pb)                                      | mg kg <sup>-1</sup> | 0.10            | 3.39      | 2.746        | 3.831        |           |              | N.D.      | 0.30         | N.D.      | N.D.         |             |
| Zinc (Zn)                                      | mg kg <sup>-1</sup> | 0.01            | 30.43     | 0.168        | 0.168        |           |              | 2.00      | 0.40         | 8.00      | 0.20         |             |
| Aluminum + Silicon (Al + Si)                   | mg kg <sup>-1</sup> | 0.10            | 10.31     | 1.09         | 0.956        |           |              | 8.00      | 0.80         | 12.0      | 0.90         |             |

8 N.D., not detected.

9

10 Table S2 Engine type, operating mode, and fuel type of each ship for each measurement

| Ship ID | Engine type      | Operating mode          | Ship ID | Engine type        | Operating mode |                    |
|---------|------------------|-------------------------|---------|--------------------|----------------|--------------------|
| CCS1    | Main engine      | Maneuvering_diesel      | OGV3    | Main engine        | 75%_diesel     |                    |
|         |                  | Cruise_HFO              |         |                    | 25%_HFO        |                    |
|         | Auxiliary engine | Diesel                  |         | 50%_HFO            |                |                    |
| CCS2    | Main engine      | Idling_diesel           |         | Auxiliary engine   | 75%_HFO        |                    |
|         |                  | Maneuvering_diesel      |         |                    | 95%_HFO        |                    |
|         |                  | Cruise_diesel           |         |                    | 50%_diesel     |                    |
| OGV1    | Main engine      | 20%_diesel <sup>a</sup> | ICS1    | Main engine        | 50%_HFO        |                    |
|         |                  | 75%_diesel              |         |                    | 75%_HFO        |                    |
|         |                  | 75%_diesel (NCR)        |         | Maneuvering_diesel |                |                    |
|         |                  | 25%_HFO                 |         | Cruise_diesel      |                |                    |
|         |                  | 50%_HFO                 |         | ICS2               | Main engine    | Idling_diesel      |
|         | 75%_HFO          | Maneuvering_diesel      |         |                    |                |                    |
|         | 85%_HFO          | Cruise_diesel           |         |                    |                |                    |
|         | Auxiliary engine | 100%_HFO                |         | ICS3               | Main engine    | Maneuvering_diesel |
|         |                  | 50%_diesel              |         |                    |                | Cruise_diesel      |
|         |                  | 50%_HFO                 |         | ICS4               | Main engine    | Maneuvering_diesel |
|         |                  | Cruise_diesel           |         |                    |                |                    |
| OGV2    |                  | Main engine             | 50%_HFO |                    | Boiler         | 75%_HFO            |
|         | 70%_HFO          |                         |         |                    |                |                    |
|         | 90%_HFO          |                         |         |                    |                |                    |
|         | Auxiliary engine | 60%_diesel              |         |                    |                |                    |
|         |                  | 75%_diesel              |         |                    |                |                    |
|         |                  | 50%_HFO                 |         |                    |                |                    |
|         |                  | 75%_HFO                 |         |                    |                |                    |
|         |                  | 75%_HFO                 |         |                    |                |                    |

11 <sup>a</sup>, means percentage of engine load under what type of fuel

12

Table S3 The detected VOC species, detection limits and MIR used in this study

| No. | Description                 | Detection limit (mg/m <sup>3</sup> ) | MIR   | No. | Description             | Detection limit (mg/m <sup>3</sup> ) | MIR   | No. | Description                          | Detection limit (mg/m <sup>3</sup> ) | MIR    |
|-----|-----------------------------|--------------------------------------|-------|-----|-------------------------|--------------------------------------|-------|-----|--------------------------------------|--------------------------------------|--------|
| 1   | ethanol                     | 0.0004                               | 1.53  | 37  | 2,3-dimethyl butane     | 0.0008                               | 0.97  | 73  | ethyl chloride                       | 0.0006                               | 0.29   |
| 2   | acrolein                    | 0.0005                               | 7.45  | 38  | 2-methyl pentane        | 0.0008                               | 1.50  | 74  | trichlorofluoromethane               | 0.0012                               | -      |
| 3   | acetone                     | 0.0005                               | 0.36  | 39  | 3-methyl pentane        | 0.0008                               | 1.80  | 75  | 1,1-dichloroethene                   | 0.0009                               | 1.79   |
| 4   | isopropyl alcohol           | 0.0005                               | 0.61  | 40  | n-hexane                | 0.0008                               | 1.24  | 76  | dichloromethane                      | 0.0008                               | 0.041  |
| 5   | methyl tertiary butyl ether | 0.0008                               | 0.73  | 41  | methyl cyclopentane     | 0.0008                               | 2.19  | 77  | chloroform                           | 0.0011                               | 0.022  |
| 6   | vinyl acetate               | 0.0008                               | 3.20  | 42  | 2,4-dimethyl pentane    | 0.0009                               | 1.55  | 78  | bromoform                            | 0.0022                               | 0.022  |
| 7   | methyl ethyl ketone         | 0.0007                               | 1.48  | 43  | cyclohexane             | 0.0008                               | 1.25  | 79  | dichlorotetrafluoroethane            | 0.0015                               | -      |
| 8   | ethyl acetate               | 0.0008                               | 0.63  | 44  | 2-methyl hexane         | 0.0009                               | 1.19  | 80  | 1,1,2-trichloro1,2,2 trifluoroethane | 0.0017                               |        |
| 9   | methyl methacrylate         | 0.0009                               | 15.61 | 45  | 2,3-dimethyl pentane    | 0.0009                               | 1.34  | 81  | trans-1,2-dichloroethene             | 0.0009                               | 1.70   |
| 10  | methyl isobutyl ketone      | 0.0009                               | 3.14  | 46  | 3-methyl hexane         | 0.0009                               | 1.61  | 82  | 1,1-dichloroethane                   | 0.0009                               | 0.069  |
| 11  | methyl n-butyl ketone       | 0.0009                               | 3.14  | 47  | 2,2,4-trimethyl pentane | 0.0010                               | 1.26  | 83  | cis-1,2-dichloroethene               | 0.0009                               | 1.70   |
| 12  | benzene                     | 0.0007                               | 0.72  | 48  | n-heptane               | 0.0009                               | 1.07  | 84  | 1,2-dichloroethane                   | 0.0009                               | 0.21   |
| 13  | toluene                     | 0.0008                               | 4.00  | 49  | methyl cyclohexane      | 0.0009                               | 1.70  | 85  | 1,1,1-trichloroethane                | 0.0012                               | 0.0049 |
| 14  | ethyl benzene               | 0.0009                               | 3.04  | 50  | 2,3,4-trimethyl pentane | 0.0010                               | 1.03  | 86  | carbon tetrachloride                 | 0.0014                               | -      |
| 15  | m/p-xylene                  | 0.0009                               | 7.795 | 51  | 2-methyl heptane        | 0.0010                               | 1.07  | 87  | 1,2-dichloropropane                  | 0.0010                               | 0.29   |
| 16  | styrene                     | 0.0009                               | 1.73  | 52  | 3-methyl heptane        | 0.0010                               | 1.24  | 88  | monobromodichloromethane             | 0.0014                               | 0.022  |
| 17  | o-xylene                    | 0.0009                               | 7.64  | 53  | n-octane                | 0.0010                               | 0.90  | 89  | trichloroethylene                    | 0.0012                               | 0.64   |
| 18  | isopropyl benzene           | 0.0011                               | 2.52  | 54  | n-nonane                | 0.0011                               | 0.78  | 90  | cis-1,3-dichloropropene              | 0.0010                               | 3.70   |
| 19  | n-propyl benzene            | 0.0011                               | 2.03  | 55  | n-Decane                | 0.0013                               | 0.68  | 91  | trans-1,3-dichloropropene            | 0.0010                               | 5.03   |
| 20  | m-ethyl toluene             | 0.0011                               | 7.39  | 56  | n-undecane              | 0.0014                               | 0.61  | 92  | 1,1,2-trichloroethane                | 0.0012                               | 0.086  |
| 21  | p-ethyl toluene             | 0.0011                               | 4.44  | 57  | n-dodecane              | 0.0015                               | 0.55  | 93  | 1,2-dibromoethane                    | 0.0017                               | 0.102  |
| 22  | 1,2,3-trimethyl benzene     | 0.0011                               | 11.97 | 58  | ethylene                | 0.0003                               | 9.00  | 94  | perchloroethylene                    | 0.0015                               | 0.031  |
| 23  | 1,3,5-trimethyl benzene     | 0.0011                               | 11.76 | 59  | propene                 | 0.0004                               | 11.66 | 95  | 1,1,2,2-tetrachloroethane            | 0.0015                               | 0.086  |
| 24  | o-ethyl toluene             | 0.0011                               | 5.59  | 60  | butene                  | 0.0005                               | 9.73  | 96  | hexachlorobutadiene                  | 0.0023                               | -      |
| 25  | 1,2,4-trimethyl benzene     | 0.0011                               | 8.87  | 61  | pentene                 | 0.0006                               | 7.21  | 97  | monochlorobenzene                    | 0.0010                               | 0.32   |
| 26  | m-diethyl benzene           | 0.0012                               | 7.10  | 62  | 1,3-butadiene           | 0.0005                               | 12.61 | 98  | benzyl chloride                      | 0.0011                               | 4.00   |
| 27  | p-diethyl benzene           | 0.0012                               | 4.43  | 63  | trans-2-butene          | 0.0005                               | 15.16 | 99  | 1,3-dichlorobenzene                  | 0.0013                               | 0.18   |
| 28  | naphthalene                 | 0.0011                               | 3.34  | 64  | cis-2-butene            | 0.0005                               | 14.24 | 100 | p-dichlorobenzene                    | 0.0013                               | 0.178  |
| 29  | ethane                      | 0.0003                               | 0.28  | 65  | isoprene                | 0.0006                               | 10.61 | 101 | o-dichlorobenzene                    | 0.0013                               | 0.178  |
| 30  | propane                     | 0.0004                               | 0.49  | 66  | trans-2-pentene         | 0.0006                               | 10.56 | 102 | 1,2,4-trichlorobenzene               | 0.0016                               | 0.178  |
| 31  | isobutane                   | 0.0005                               | 1.23  | 67  | cis-2-pentene           | 0.0006                               | 10.38 | 103 | dibromochloromethane                 | 0.0018                               | 0.022  |
| 32  | n-butane                    | 0.0005                               | 1.15  | 68  | hexene                  | 0.0008                               | 5.49  | 104 | tetrahydrofuran                      | 0.0006                               | 4.31   |
| 33  | isopentane                  | 0.0006                               | 1.23  | 69  | dichlorodifluoromethane | 0.0011                               | -     | 105 | carbon disulfide                     | 0.0007                               | 0.25   |

---

|    |                     |        |      |    |                 |        |        |     |             |        |      |
|----|---------------------|--------|------|----|-----------------|--------|--------|-----|-------------|--------|------|
| 34 | n-pentane           | 0.0006 | 1.31 | 70 | methyl chloride | 0.0004 | 0.04   | 106 | 1,4-dioxane | 0.0008 | 2.62 |
| 35 | 2,2-dimethyl butane | 0.0008 | 1.17 | 71 | vinyl chloride  | 0.0006 | 2.83   |     |             |        |      |
| 36 | cyclopentane        | 0.0006 | 2.39 | 72 | methyl bromide  | 0.0008 | 0.0187 |     |             |        |      |

---

14

Table S4 The SOA yields of VOC species used in this study

| No. | Description         | Yeild                |                     | Data sources            |
|-----|---------------------|----------------------|---------------------|-------------------------|
|     |                     | High-NO <sub>x</sub> | Low-NO <sub>x</sub> |                         |
| 1   | Benzene             | 0.281                | 0.369               | (Ng et al., 2007)       |
| 2   | Toluene             | 0.107                | 0.303               | (Ng et al., 2007)       |
| 3   | Ethyl Benzene       | 0.064                | 0.363               | (Ng et al., 2007)       |
| 4   | m/p-xylene          | 0.064                | 0.363               | (Ng et al., 2007)       |
| 5   | Styrene             | 0.064                | 0.363               | (Ng et al., 2007)       |
| 6   | o-Xylene            | 0.064                | 0.363               | (Ng et al., 2007)       |
| 7   | Isopropyl Benzene   | 0.064                | 0.363               | (Ng et al., 2007)       |
| 8   | n-Propyl Benzene    | 0.064                | 0.363               | (Ng et al., 2007)       |
| 9   | m-Ethyl Toluene     | 0.064                | 0.363               | (Ng et al., 2007)       |
| 10  | p-Ethyl Toluene     | 0.064                | 0.363               | (Ng et al., 2007)       |
| 11  | Naphthalene         | 0.064                | 0.363               | (Chan et al., 2009)     |
| 12  | Cyclopentane        | 0.04                 | 0.04                | (Lim and Ziemann, 2009) |
| 13  | Methyl Cyclopentane | 0.04                 | 0.04                | (Lim and Ziemann, 2009) |
| 14  | Cyclohexane         | 0.04                 | 0.04                | (Lim and Ziemann, 2009) |
| 15  | n-Heptane           | 0.009                | 0.009               | (Lim and Ziemann, 2009) |
| 16  | Methyl Cyclohexane  | 0.04                 | 0.04                | (Lim and Ziemann, 2009) |
| 17  | 2-Methyl Heptane    | 0.009                | 0.009               | (Lim and Ziemann, 2009) |
| 18  | 3-Methyl Heptane    | 0.009                | 0.009               | (Lim and Ziemann, 2009) |
| 19  | n-Octane            | 0.041                | 0.041               | (Lim and Ziemann, 2009) |
| 20  | n-Nonane            | 0.081                | 0.081               | (Lim and Ziemann, 2009) |
| 21  | n-Decane            | 0.146                | 0.146               | (Lim and Ziemann, 2009) |
| 22  | n-Undecane          | 0.27                 | 0.27                | (Lim and Ziemann, 2009) |
| 23  | n-Dodecane          | 0.348                | 0.348               | (Lim and Ziemann, 2009) |
| 24  | Ethylene            | 0.0169               | 0.0169              | (Derwent et al., 2010)  |
| 25  | Propene             | 0.0208               | 0.0208              | (Derwent et al., 2010)  |
| 26  | Butene              | 0.0156               | 0.0156              | (Derwent et al., 2010)  |
| 27  | 1,3-Butadiene       | 0.0234               | 0.0234              | (Derwent et al., 2010)  |
| 28  | Trans-2-Butene      | 0.052                | 0.052               | (Derwent et al., 2010)  |
| 29  | Cis-2-Butene        | 0.0468               | 0.0468              | (Derwent et al., 2010)  |
| 30  | Isoprene            | 0.02                 | 0.02                | (Grosjean, 1992)        |
| 31  | Trans-2-Pentene     | 0.0403               | 0.0403              | (Derwent et al., 2010)  |
| 32  | Cis-2-Pentene       | 0.0403               | 0.0403              | (Derwent et al., 2010)  |

Table S5 Emission factors of gaseous pollutants for the test ships

| Ship ID | Engine type      | Operating mode     | CO <sub>2</sub><br>(g kg <sup>-1</sup> fuel) | CO<br>(g kg <sup>-1</sup> fuel) | NO <sub>2</sub><br>(g kg <sup>-1</sup> fuel) | NO<br>(g kg <sup>-1</sup> fuel) | NO <sub>x</sub><br>(g kg <sup>-1</sup> fuel) | VOCs<br>(g kg <sup>-1</sup> fuel) |
|---------|------------------|--------------------|----------------------------------------------|---------------------------------|----------------------------------------------|---------------------------------|----------------------------------------------|-----------------------------------|
| CCS1    | Main engine      | Maneuvering_diesel | 3124                                         | 18.6                            | 2.46                                         | 32.8                            | 35.3                                         | 1.87±0.21                         |
|         |                  | Cruise_HFO         | 3145                                         | 5.49                            | 2.66                                         | 35                              | 37.6                                         | 2.22±0.47                         |
|         | Auxiliary engine | Diesel             | 3148                                         | 3.51                            | 1.89                                         | 27.9                            | 29.8                                         | 0.60±0.08                         |
| CCS2    | Main engine      | Idling_diesel      | 3129                                         | 15.7                            | 5.15                                         | 31.2                            | 36.4                                         | 3.01±0.63                         |
|         |                  | Maneuvering_diesel | 3077                                         | 48.8                            | 1.17                                         | 18                              | 19.1                                         | 1.00±0.21                         |
|         |                  | Cruise_diesel      | 3145                                         | 5.38                            | 1.18                                         | 19.7                            | 20.9                                         | 0.10±0.02                         |
| OGV1    | Main engine      | 20%_diesel         | 3128                                         | 2.49                            | 22.9                                         | 59.8                            | 82.7                                         | 2.10±0.44                         |
|         |                  | 75%_diesel         | 3132                                         | 1.49                            | 9.57                                         | 64.1                            | 73.7                                         | 0.45±0.09                         |
|         |                  | 75%_diesel (NCR)   | 3129                                         | 2.44                            | 6.23                                         | 35.8                            | 42.1                                         | 0.46±0.10                         |
|         |                  | 25%_HFO            | 3173                                         | 2.59                            | 22.2                                         | 66.9                            | 89.1                                         | 0.75±0.16                         |
|         |                  | 50%_HFO            | 3178                                         | 2.44                            | 12.8                                         | 61                              | 73.8                                         | 0.81±0.17                         |
|         |                  | 75%_HFO            | 3170                                         | 2.46                            | 8.18                                         | 51.7                            | 59.9                                         | 0.59±0.12                         |
|         |                  | 85%_HFO            | 3173                                         | 2.46                            | 8.47                                         | 54                              | 62.4                                         | 1.65±0.34                         |
|         |                  | 100%_HFO           | 3173                                         | 3.8                             | 6.31                                         | 56.7                            | 63                                           | 0.95±0.20                         |
|         | Auxiliary engine | 50%_diesel         | 3108                                         | 13.8                            | 1.38                                         | 27.1                            | 28.4                                         | 0.94±0.20                         |
|         |                  | 50%_HFO            | 3174                                         | 3.33                            | 1.45                                         | 20.8                            | 22.3                                         | 0.31±0.07                         |
| OGV2    | Main engine      | 50%_HFO            | 3181                                         | 2.93                            | 18.58                                        | 74.23                           | 92.81                                        | 0.23±0.05                         |
|         |                  | 70%_HFO            | 3182                                         | 2.35                            | 12.2                                         | 64.7                            | 76.8                                         | 0.14±0.04                         |
|         |                  | 90%_HFO            | 3182                                         | 1.91                            | 12                                           | 62.2                            | 74.2                                         | 0.10±0.08                         |
|         | Auxiliary engine | 60%_diesel         | 3126                                         | 2.63                            | 1.89                                         | 31.16                           | 33.04                                        | 0.09±0.02                         |
|         |                  | 75%_diesel         | 3132                                         | 1.32                            | 1.98                                         | 25.82                           | 27.8                                         | 0.12±0.03                         |
|         |                  | 50%_HFO            | 3183                                         | 1.86                            | 3.62                                         | 29.79                           | 33.41                                        | 0.37±0.08                         |
|         |                  | 75%_HFO            | 3183                                         | 2                               | 3.28                                         | 33.83                           | 37.11                                        | 0.23±0.05                         |

|         |                  |                    |      |      |      |           |      |           |
|---------|------------------|--------------------|------|------|------|-----------|------|-----------|
|         | Boiler           | HFO                | 3186 | 0.62 | 0.15 | 6.11      | 6.26 | 0.17±0.04 |
| OGV3    | Main engine      | 75%_diesel         | 3131 | 1.64 | 7.47 | 49.8      | 57.3 | 0.22±0.05 |
|         |                  | 25%_HFO            | 3183 | 1.9  | 18.8 | 62.2      | 81   | 0.14±0.04 |
|         | Auxiliary engine | 50%_HFO            | 3182 | 2.49 | 8.09 | 60.2      | 68.3 | 0.46±0.10 |
|         |                  | 75%_HFO            | 3183 | 1.78 | 7.11 | 56.5      | 63.6 | 0.34±0.08 |
|         |                  | 95%_HFO            | 3181 | 2.7  | 2.37 | 40.5      | 42.9 | 0.37±0.08 |
|         |                  | 50%_diesel         | 3130 | 2.78 | 1.02 | 24.4      | 25.4 | 0.13±0.03 |
|         |                  | 50%_HFO            | 3184 | 2.51 | 0.57 | 25.8      | 26.3 | 0.23±0.05 |
| 75%_HFO | 3185             | 1.91               | 0.4  | 26.6 | 27   | 0.15±0.03 |      |           |
| ICS1    | Main engine      | Maneuvering_diesel | 3108 | 16.9 | 8.36 | 55.9      | 64.2 | 0.49±0.10 |
|         |                  | Cruise_diesel      | 3068 | 42.5 | 7.64 | 46.2      | 53.8 | 0.43±0.09 |
| ICS2    | Main engine      | Idling_diesel      | 2622 | 327  | 15.8 | 36.1      | 51.9 | 1.08±0.23 |
|         |                  | Maneuvering_diesel | 3117 | 11.5 | 14.5 | 68.2      | 82.7 | 0.11±0.02 |
|         |                  | Cruise_diesel      | 3116 | 12.2 | 12.6 | 72.4      | 85   | 0.17±0.04 |
| ICS3    | Main engine      | Maneuvering_diesel | 2852 | 180  | 13.2 | 44.7      | 57.9 | 2.53±0.53 |
|         |                  | Cruise_diesel      | 2924 | 134  | 11.2 | 57.5      | 68.8 | 2.87±0.60 |
| ICS4    | Main engine      | Maneuvering_diesel | 2998 | 87.2 | -    | -         | -    | -         |
|         |                  | Cruise_diesel      | 3103 | 20.3 | 8.06 | 12.3      | 20.4 | 0.35±0.07 |



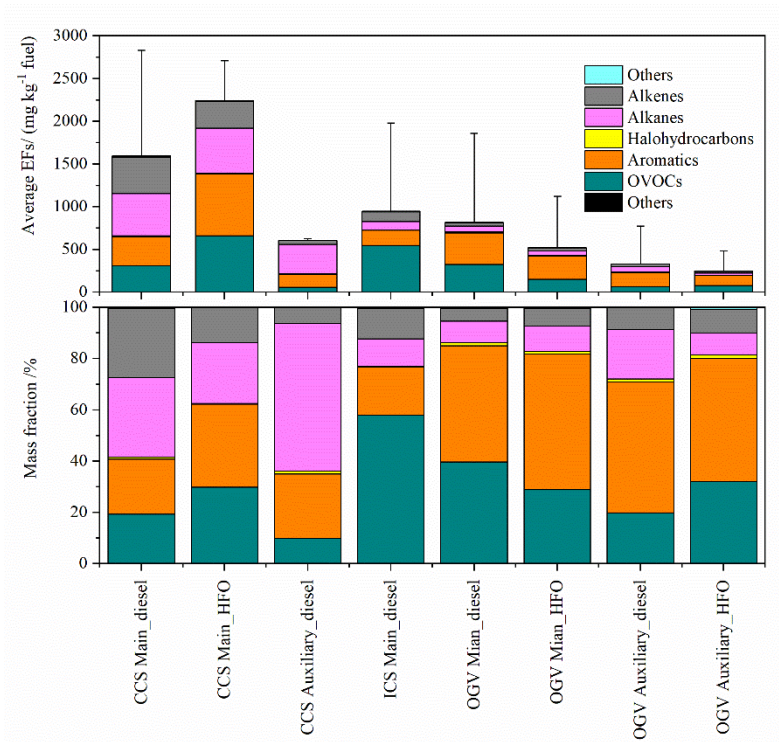

19

20 Figure S1 Average EFs of VOCs components and their mass fractions under different  
 21 ships with different fuels. (These average  $EF_{VOCs}$  were calculated through unweighted  
 22 average of different actual operating modes)  
 23

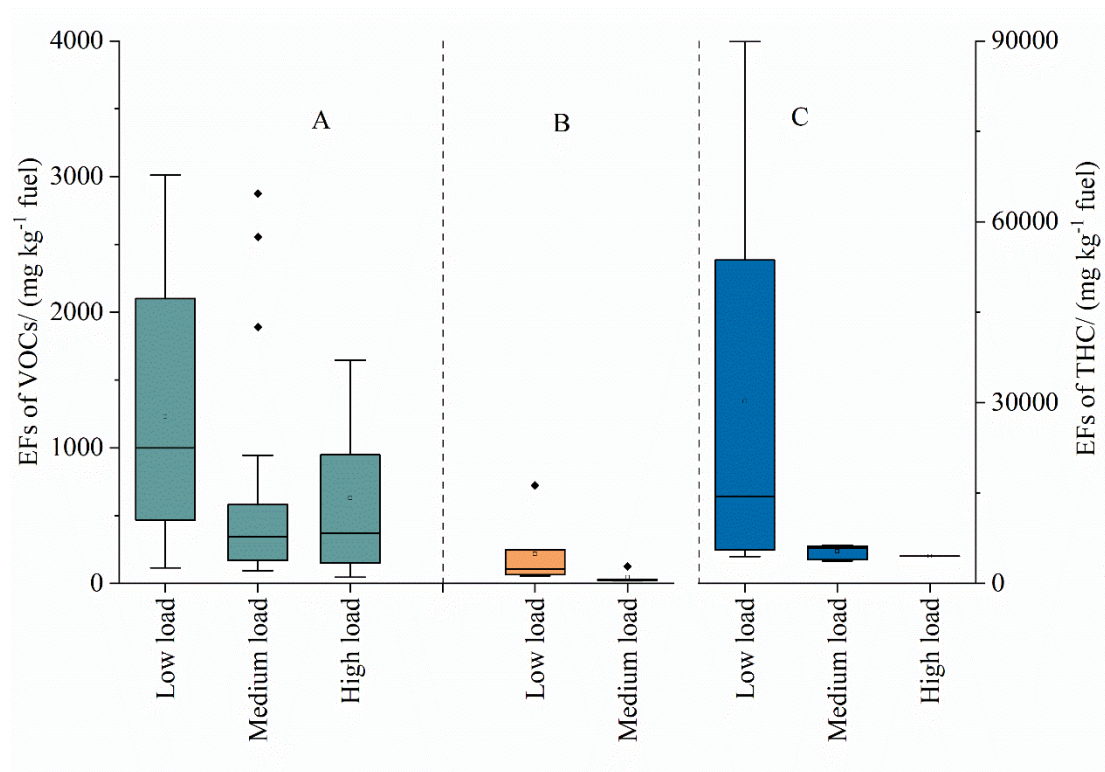

25

26 Figure S2 EF<sub>VOCs</sub> from ship exhausts under different operating modes A, This study;

27 B, (Huang et al. 2018); C, (Radischat et al. 2015), because the THC emission factors

28 were reported in this study with mg/kW h, the EFs presented in this figure were

29 calculated by assuming that the fuel consumption rate for the test ships was 200 g fuel

30

kWh<sup>-1</sup>

31

32

Table S6 Mass concentrations of partial n-alkanes and PAHs in fuels (mg kg<sup>-1</sup> fuel)

| Species       | Diesel     | HFO        |                | Diesel    | HFO        |
|---------------|------------|------------|----------------|-----------|------------|
| n-dodecane    | 2.39±1.21  | 0.16±0.09  | naphthalene    | 0.11±0.04 | 2.16±1.69  |
| n-tridecane   | 2.05±0.80  | 0.31±0.08  | alkylated nap  | 0.21±0.09 | 0.94±0.72  |
| n-tetradecane | 2.00±0.76  | 0.41±0.03  | acenaphthylene | 0.23±0.12 | 0.65±0.65  |
| n-pentadecane | 2.75±1.36  | 0.63±0.21  | acenaphthene   | 0.11±0.04 | 0.18±0.12  |
| n-hexadecane  | 3.34±1.97  | 0.83±0.39  | fluorene       | 0.06±0.01 | 0.43±0.33  |
| n-heptadecane | 3.12±1.99  | 0.88±0.49  | phenanthrene   | 0.07±0.01 | 0.43±0.26  |
| n-octadecane  | 2.41±1.49  | 0.82±0.45  | anthracene     | 0.05±0.00 | 0.15±0.07  |
| n-nonadecane  | 1.99±1.19  | 0.83±0.47  | fluoranthene   | 0.02±0.00 | 0.17±0.11  |
| n-eicosane    | 1.57±0.85  | 0.78±0.45  | pyrene         | 0.05±0.01 | 0.48±0.29  |
| n-heneicosane | 1.19±0.54  | 0.79±0.48  | PAHs           | 89.4±29.8 | 146.1±75.6 |
| n-docosane    | 0.88±0.34  | 0.77±0.46  | UCM            | 19.6±11.9 | 17.57±9.95 |
| n-alkanes     | 307.0±87.1 | 259.4±68.1 |                |           |            |
| b-alkanes     | 26.9±13.8  | 8.01±3.79  |                |           |            |

33

34

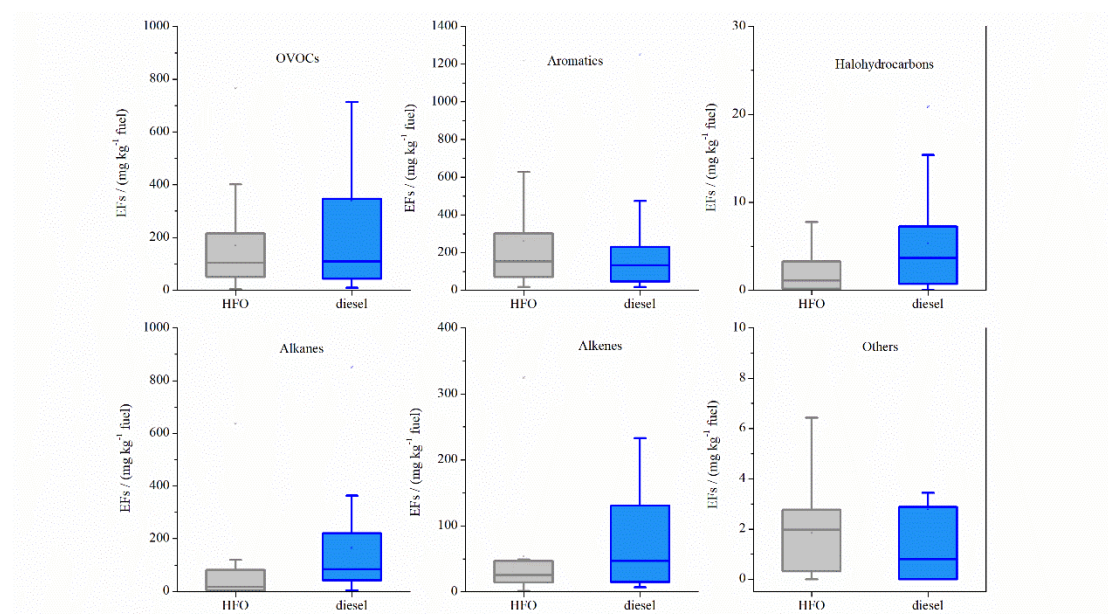

35

36

Figure S3 Box-whisker plots of VOC components between HFO and diesel

37

Table S7 Mass fractions of test VOC species for different ship engines with different fuels

|    |                             | CCS Main-<br>diesel | CCS Main-HFO | CCS Auxiliary-<br>diesel | ICS Main-diesel | OGV Main-<br>diesel | OGV Main-<br>HFO | OGV Auxiliary-<br>diesel | OGV Auxiliary-<br>HFO |
|----|-----------------------------|---------------------|--------------|--------------------------|-----------------|---------------------|------------------|--------------------------|-----------------------|
| 1  | Ethanol                     | n.d.                | n.d.         | n.d.                     | n.d.            | n.d.                | n.d.             | n.d.                     | n.d.                  |
| 2  | Acrolein                    | 8.96±5.59           | 4.31±0.78    | 3.19±0.06                | 6.39±7.18       | 3.73±1.82           | 5.08±3.1         | 4.84±4.51                | 5.07±4.93             |
| 3  | Acetone                     | 6.87±2.55           | 22.8±1.23    | 4.97±1.64                | 32.9±24.5       | 38.7±23.6           | 25.1±14.3        | 22.3±6.25                | 27.5±29.3             |
| 4  | Isopropyl Alcohol           | n.d.                | n.d.         | n.d.                     | n.d.            | n.d.                | n.d.             | n.d.                     | n.d.                  |
| 5  | Methyl Tertiary Butyl Ether | n.d.                | n.d.         | n.d.                     | n.d.            | n.d.                | n.d.             | n.d.                     | n.d.                  |
| 6  | Vinyl Acetate               | n.d.                | 0.37±0.52    | 0.37±0.52                | n.d.            | n.d.                | n.d.             | n.d.                     | n.d.                  |
| 7  | Methyl Ethyl Ketone         | 1.32±0.47           | 1.48±0.05    | 0.68±0.14                | 2.04±1.21       | 0.88±0.89           | 0.69±0.64        | 0.1±0.2                  | 0.25±0.38             |
| 8  | Ethyl Acetate               | 0.04±0.05           | 0.07±0.1     | 0.1±0.14                 | n.d.            | n.d.                | n.d.             | n.d.                     | n.d.                  |
| 9  | Methyl Methacrylate         | n.d.                | n.d.         | n.d.                     | n.d.            | n.d.                | 0.11±0.37        | n.d.                     | n.d.                  |
| 10 | Methyl Isobutyl Ketone      | 0.03±0.04           | 0.07±0.09    | n.d.                     | n.d.            | 0.37±0.74           | 0.61±1.44        | 0.18±0.35                | n.d.                  |
| 11 | Methyl n-Butyl Ketone       | 0.19±0.23           | n.d.         | n.d.                     | n.d.            | 0.11±0.22           | 0.06±0.12        | n.d.                     | n.d.                  |
| 12 | Benzene                     | 5.53±2.76           | 8.74±0.11    | 2.14±0.09                | 9.34±6.73       | 2.55±1.76           | 2.28±1.49        | 2.34±1.24                | 2.58±0.8              |
| 13 | Toluene                     | 3.42±1.93           | 8.03±0.11    | 2.74±0.15                | 2.55±1.75       | 1.09±0.7            | 2.92±4.12        | 1.69±1.16                | 1.56±1                |
| 14 | Ethyl Benzene               | 0.89±0.4            | 1.62±0.1     | 0.96±0.07                | 0.86±0.88       | 0.64±0.47           | 1.62±1.6         | 2.22±0.82                | 1.65±1.34             |
| 15 | m/p-xylene                  | 2.43±1.28           | 4.58±0.22    | 3±0.26                   | 1.88±2.04       | 2.06±1.54           | 3.76±3.81        | 5.07±2.64                | 4.07±3.26             |
| 16 | Styrene                     | n.d.                | n.d.         | n.d.                     | n.d.            | n.d.                | n.d.             | n.d.                     | n.d.                  |
| 17 | o-Xylene                    | 1.12±0.47           | 1.67±0.07    | 1.33±0.12                | 1.13±1.07       | 1.21±0.95           | 2.37±2.6         | 3.06±1.73                | 2.52±2.14             |
| 18 | Isopropyl Benzene           | 0.1±0.08            | 0.18±0.01    | 0.28±0.04                | 0.24±0.23       | 0.03±0.07           | 0.01±0.03        | n.d.                     | n.d.                  |
| 19 | n-Propyl Benzene            | 0.43±0.1            | 0.37±0.01    | 0.51±0.05                | 0.64±0.62       | 0.09±0.17           | 0.14±0.21        | 0.16±0.19                | 0.07±0.11             |
| 20 | m-Ethyl Toluene             | 1.15±0.37           | 1.09±0.04    | 1.29±0.12                | 1.79±2.13       | 0.74±0.42           | 0.75±0.49        | 0.49±0.63                | 0.64±0.65             |
| 21 | p-Ethyl Toluene             | 0.36±0.25           | 0.64±0.02    | 0.64±0.06                | 0.96±1.13       | 0.16±0.33           | 0.24±0.3         | 0.21±0.24                | 0.2±0.26              |

|    |                         |           |           |           |           |           |           |            |           |
|----|-------------------------|-----------|-----------|-----------|-----------|-----------|-----------|------------|-----------|
| 22 | 1,2,3-Trimethyl Benzene | n.d.      | n.d.      | n.d.      | 0.93±1.15 | 1.13±--   | 0.37±0.33 | 0.2±0.34   | 0.39±0.58 |
| 23 | 1,3,5-Trimethyl Benzene | 2.09±0.84 | 1.38±0.05 | 2.89±0.24 | 0.79±0.94 | 0.23±0.46 | 0.24±0.24 | 0.24±0.28  | 0.26±0.3  |
| 24 | o-Ethyl Toluene         | 0.55±0.17 | 0.47±0.01 | 0.74±0.07 | 0.73±0.82 | 0.32±0.38 | 0.32±0.34 | 0.31±0.4   | 0.38±0.44 |
| 25 | 1,2,4-Trimethyl Benzene | 1.42±0.44 | 1.12±0.03 | 2.71±0.25 | 3.2±4.11  | 1.71±1.33 | 1.66±0.85 | 1.97±0.54  | 1.74±1.28 |
| 26 | m-Diethyl Benzene       | 0.16±0.12 | 0.09±0.01 | 0.28±0.04 | 0.36±0.4  | 0.08±0.15 | n.d.      | n.d.       | n.d.      |
| 27 | p-Diethyl Benzene       | 1.51±0.6  | 0.54±0.04 | 1.41±0.1  | 0.01±0.04 | n.d.      | n.d.      | n.d.       | n.d.      |
| 28 | Naphthalene             | 2.32±1.27 | 1.96±0.47 | 4.15±1.54 | 2.79±1.49 | 19.8±25.8 | 34.5±17.6 | 27.1±12.01 | 29.2±24.6 |
| 29 | Ethane                  | n.d.      | n.d.      | n.d.      | 0.11±0.15 | 0.08±--   | 0.48±0.75 | 0.91±0.61  | 0.37±0.41 |
| 30 | Propane                 | 0.56±0.66 | 0.39±0.02 | 0.21±0.07 | 0.45±0.25 | 0.14±0.29 | 0.23±0.34 | 0.79±1.38  | 0.34±0.67 |
| 31 | Isobutane               | 3.73±2.45 | 1.26±0.18 | 1.59±0.71 | 0.07±0.04 | 0.09±0.11 | 0.04±0.08 | 0.02±0.03  | 0.04±0.11 |
| 32 | n-Butane                | 0.18±0.19 | 0.66±0.25 | 5.25±7.06 | 0.12±0.06 | 0.26±0.23 | 0.2±0.24  | 0.12±0.17  | 0.15±0.31 |
| 33 | Isopentane              | 3.43±4.57 | 1.47±0.3  | 1.67±1.36 | 0.08±0.03 | n.d.      | 0.14±0.33 | 0.11±0.23  | 0.19±0.46 |
| 34 | n-Pentane               | 3.17±5.63 | 1.36±0.25 | 1.72±1.8  | 0.07±0.04 | 0.32±0.34 | 0.29±0.38 | 0.15±0.24  | 0.24±0.51 |
| 35 | 2,2-Dimethyl Butane     | n.d.      | 0.01±0.02 | n.d.      | n.d.      | n.d.      | n.d.      | n.d.       | n.d.      |
| 36 | Cyclopentane            | 0.03±0.06 | 0.17±0.04 | n.d.      | 0.08±0.23 | n.d.      | n.d.      | n.d.       | n.d.      |
| 37 | 2,3-Dimethyl Butane     | n.d.       | n.d.      |
| 38 | 2-Methyl Pentane        | 0.13±0.25 | 0.66±0.12 | 0.32±0.01 | n.d.      | n.d.      | n.d.      | n.d.       | n.d.      |
| 39 | 3-Methyl Pentane        | 0.07±0.14 | 0.25±0.04 | 0.24±0.02 | n.d.      | n.d.      | n.d.      | n.d.       | n.d.      |
| 40 | n-Hexane                | 0.47±0.44 | 1.19±0.2  | 0.77±0.03 | n.d.      | 0.2±0.23  | 0.17±0.22 | 0.07±0.14  | 0.16±0.3  |
| 41 | Methyl Cyclopentane     | 0.13±0.25 | 0.47±0.07 | 0.48±0.02 | 0.08±0.07 | n.d.      | n.d.      | n.d.       | n.d.      |
| 42 | 2,4-Dimethyl Pentane    | 0.03±0.05 | 0.08±0.01 | n.d.      | 0.03±0.07 | n.d.      | n.d.      | n.d.       | n.d.      |
| 43 | Cyclohexane             | 0.32±0.28 | 0.53±0.05 | 0.65±0.01 | n.d.      | 0.12±0.24 | n.d.      | 0.08±0.16  | n.d.      |
| 44 | 2-Methyl Hexane         | 0.5±0.99  | 1.18±0.16 | 2.16±0.11 | n.d.      | n.d.      | n.d.      | n.d.       | n.d.      |
| 45 | 2,3-Dimethyl Pentane    | 0.13±0.26 | 0.41±0.07 | 0.56±0.04 | 0.03±0.06 | n.d.      | n.d.      | n.d.       | n.d.      |
| 46 | 3-Methyl Hexane         | n.d.       | n.d.      |

|    |                         |           |           |           |           |           |           |           |           |
|----|-------------------------|-----------|-----------|-----------|-----------|-----------|-----------|-----------|-----------|
| 47 | 2,2,4-Trimethyl Pentane | n.d.      | n.d.      | n.d.      | n.d.      | 0.04±0.08 | 0.03±0.05 | n.d.      | n.d.      |
| 48 | n-Heptane               | 1.45±2.71 | 4.06±0.38 | 6.02±0.31 | 0.18±0.13 | 0.27±0.24 | 0.18±0.28 | 0.1±0.2   | 0.12±0.27 |
| 49 | Methyl Cyclohexane      | 0.98±1.65 | 1.94±0.29 | 4.6±0.28  | 0.45±0.34 | 0.63±0.53 | 0.39±0.62 | 0.32±0.41 | 0.33±0.8  |
| 50 | 2,3,4-Trimethyl Pentane | n.d.      |
| 51 | 2-Methyl Heptane        | n.d.      | n.d.      | n.d.      | 0.27±0.24 | 0.05±0.1  | 0.05±0.13 | 0.04±0.09 | 0.02±0.03 |
| 52 | 3-Methyl Heptane        | 0.39±0.65 | 0.68±0.22 | 1.8±0.1   | 0.15±0.18 | 0.09±0.17 | 0.02±0.09 | n.d.      | n.d.      |
| 53 | n-Octane                | n.d.      | n.d.      | n.d.      | 0.77±0.6  | 0.88±0.73 | 0.62±0.92 | 0.42±0.55 | 0.51±1.24 |
| 54 | n-Nonane                | 2.31±0.93 | 2.53±0.33 | 6.91±0.65 | 2.16±1.53 | 1.92±1.19 | 1.43±2.02 | 1.14±1.44 | 1.4±2.68  |
| 55 | n-Decane                | 4.11±0.78 | 1.92±0.14 | 6.96±0.58 | 4.29±3.86 | 1.39±1.43 | 1.47±1.53 | 1.89±2.2  | 1.4±2.15  |
| 56 | n-Undecane              | 5.41±1.97 | 1.22±0.13 | 7.31±0.76 | 3.54±2.64 | 3.69±5.5  | 1.3±1.03  | 3.18±4.55 | 1.88±1.51 |
| 57 | n-Dodecane              | 6.06±3.3  | 1.11±0.03 | 8.45±1.22 | 3.36±1.95 | 4.34±6.28 | 1.6±1.89  | 3.27±4.53 | 4.27±4.86 |
| 58 | Ethylene                | n.d.      | n.d.      | n.d.      | 0.22±0.66 | 0.33±--   | 1.9±2.19  | 5.15±4.05 | 2.71±3.79 |
| 59 | Propene                 | 8.85±4.15 | 5.57±0.83 | 2.3±0.12  | 8.37±5.1  | 2.57±2.37 | 3.58±1.94 | 5.46±3.1  | 3.93±3.08 |
| 60 | Butene                  | 6.47±3.32 | 3.29±0.49 | 2.32±0.88 | 2.44±1.52 | 0.66±1.32 | 0.97±1.02 | 1.23±1.49 | 0.75±0.72 |
| 61 | Pentene                 | 2.62±1.33 | 1.36±0.2  | 0.59±0.04 | 1.17±0.74 | 0.48±0.58 | 0.57±0.43 | 0.78±0.6  | 0.47±0.78 |
| 62 | 1,3-Butadiene           | n.d.      | n.d.      | n.d.      | n.d.      | 4.19±7.45 | 0.94±1.92 | n.d.      | n.d.      |
| 63 | Trans-2-Butene          | 0.51±0.38 | 0.39±0.02 | 0.18±0    | 0.14±0.18 | 0.06±0.13 | 0.07±0.1  | 0.15±0.19 | 0.12±0.21 |
| 64 | Cis-2-Butene            | 0.26±0.21 | 0.18±0    | 0.1±0.01  | 0.08±0.11 | 0.03±0.06 | 0.04±0.06 | 0.1±0.12  | 0.08±0.15 |
| 65 | Isoprene                | n.d.      |
| 66 | Trans-2-Pentene         | 0.32±0.23 | 0.35±0.03 | 0.15±0    | 0.08±0.1  | 0.04±0.08 | 0.02±0.03 | 0.09±0.1  | 0.02±0.04 |
| 67 | Cis-2-Pentene           | 2.61±1.32 | 0.99±0.73 | 0.59±0.04 | 0.04±0.07 | 0.02±0.03 | 0.01±0.02 | 0.02±0.04 | n.d.      |
| 68 | Hexene                  | 2.76±1.32 | 2.17±0.08 | 0.6±0.01  | 0.99±0.61 | 0.4±0.8   | 0.47±0.64 | 0.39±0.46 | 0.42±0.74 |
| 69 | Dichlorodifluoromethane | 0.14±0.27 | n.d.      | n.d.      | 0.03±0.02 | n.d.      | n.d.      | n.d.      | n.d.      |
| 70 | Methyl Chloride         | 0.19±0.2  | 0.04±0.01 | 0.31±0.21 | 0.05±0.11 | 0.74±1.01 | 0.39±0.93 | 0.56±1.12 | 0.45±0.69 |
| 71 | Vinyl Chloride          | 0.05±0.1  | 0.03±0    | 0.16±0    | n.d.      | n.d.      | 0.02±0.05 | n.d.      | n.d.      |

|    |                                         |           |           |           |           |           |           |           |           |
|----|-----------------------------------------|-----------|-----------|-----------|-----------|-----------|-----------|-----------|-----------|
| 72 | Methyl Bromide                          | n.d.      | n.d.      | n.d.      | 0.01±0.01 | 0.3±0.39  | 0.12±0.43 | 0.03±0.05 | 0.04±0.11 |
| 73 | Ethyl Chloride                          | n.d.      | 0.01±0.01 | n.d.      | 0.01±0.03 | 0.04±0.07 | 0.01±0.03 | 0.06±0.12 | n.d.      |
| 74 | Trichlorofluoromethane                  | n.d.      | n.d.      | n.d.      | 0.02±0.01 | n.d.      | n.d.      | n.d.      | 0.07±0.16 |
| 75 | 1,1-Dichloroethene                      | n.d.      |
| 76 | Dichloromethane                         | 0.37±0.49 | 0.09±0.09 | 0.17±0.24 | 0.11±0.12 | 0.22±0.25 | 0.03±0.07 | 0.45±0.79 | 0.14±0.33 |
| 77 | Chloroform                              | 0.06±0.08 | n.d.      | n.d.      | 0.02±0.04 | n.d.      | n.d.      | n.d.      | n.d.      |
| 78 | Bromoform                               | n.d.      | 0.51±1.25 |
| 79 | Dichlorotetrafluoroethane               | n.d.      | n.d.      | n.d.      | n.d.      | 0±--      | n.d.      | n.d.      | n.d.      |
| 80 | 1,1,2-Trichloro1,2,2<br>Trifluoroethane | n.d.      |
| 81 | Trans-1,2-Dichloroethene                | n.d.      |
| 82 | 1,1-Dichloroethane                      | n.d.      |
| 83 | Cis-1,2-Dichloroethene                  | n.d.      |
| 84 | 1,2-Dichloroethane                      | n.d.      | 0.01±0.02 | n.d.      | n.d.      | n.d.      | n.d.      | n.d.      | n.d.      |
| 85 | 1,1,1-Trichloroethane                   | n.d.      |
| 86 | Carbon Tetrachloride                    | n.d.      | n.d.      | n.d.      | 0.01±0.02 | n.d.      | n.d.      | n.d.      | n.d.      |
| 87 | 1,2-Dichloropropane                     | n.d.      |
| 88 | Monobromodichloromethane                | n.d.      |
| 89 | Trichloroethylene                       | n.d.      | 0.02±0.02 | n.d.      | n.d.      | n.d.      | n.d.      | n.d.      | n.d.      |
| 90 | Cis-1,3-Dichloropropene                 | n.d.      |
| 91 | Trans-1,3-Dichloropropene               | n.d.      |
| 92 | 1,1,2-Trichloroethane                   | n.d.      |
| 93 | 1,2-Dibromoethane                       | n.d.      |
| 94 | Perchloroethylene                       | n.d.      |
| 95 | 1,1,2,2-Tetrachloroethane               | n.d.      |

|     |                        |           |           |           |           |           |           |           |           |
|-----|------------------------|-----------|-----------|-----------|-----------|-----------|-----------|-----------|-----------|
| 96  | Hexachlorobutadiene    | n.d.      |
| 97  | Monochlorobenzene      | n.d.      | 0.13±0.01 | 0.4±0.02  | 0.03±0.04 | 0.08±0.17 | 0.1±0.24  | 0.39±0.7  | 0.14±0.29 |
| 98  | Benzyl?Chloride        | 0.02±0.05 | n.d.      | n.d.      | 0.03±0.08 | n.d.      | n.d.      | n.d.      | 0.04±0.1  |
| 99  | 1,3-Dichlorobenzene    | n.d.      | n.d.      | n.d.      | n.d.      | n.d.      | 0.01±0.03 | n.d.      | n.d.      |
| 100 | P-Dichlorobenzene      | n.d.      |
| 101 | O-Dichlorobenzene      | n.d.      |
| 102 | 1,2,4-Trichlorobenzene | n.d.      | n.d.      | n.d.      | n.d.      | n.d.      | n.d.      | 1.5±2.87  | 0.56±1.16 |
| 103 | Dibromochloromethane   | n.d.      |
| 104 | Tetrahydrofuran        | 0.1±0.12  | 0.06±0.08 | n.d.      | 0.02±0.06 | n.d.      | n.d.      | n.d.      | n.d.      |
| 105 | Carbon Disulfide       | 0.22±0.21 | 0.16±0.03 | 0.06±0.09 | 0.32±0.29 | 0.91±1.1  | 0.39±0.53 | 0.07±0.14 | 0.69±0.61 |
| 106 | 1,4-Dioxane            | n.d.      |

39

40 n.d., not detected



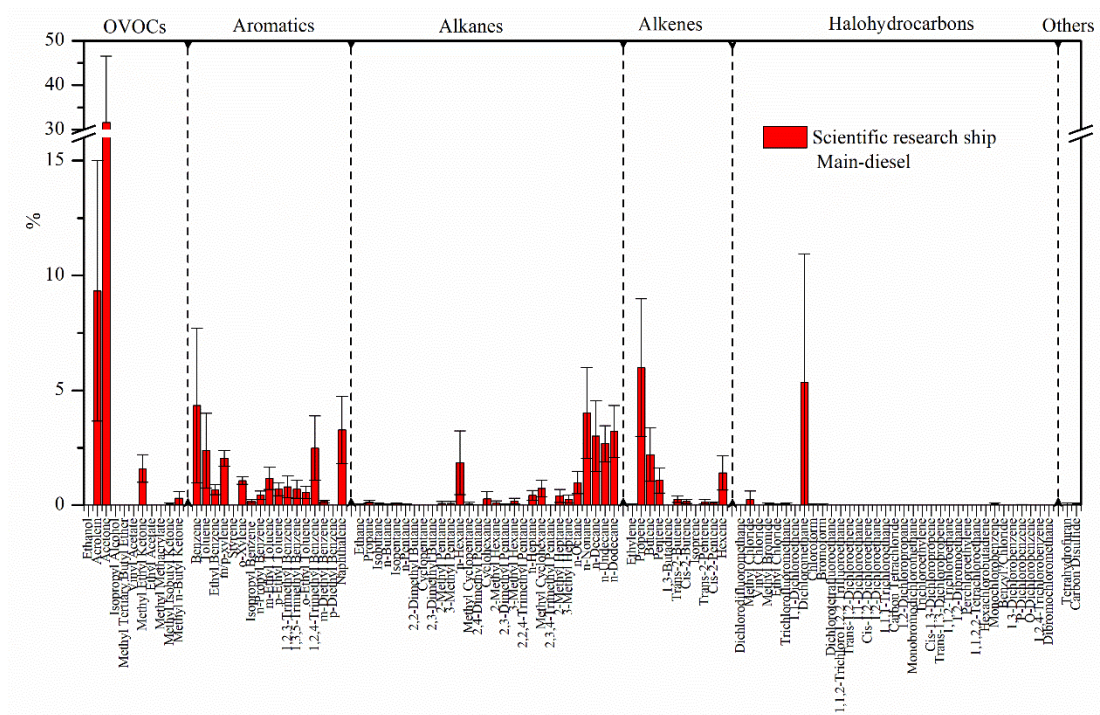

42

43

Figure S4 Profile of VOCs from a test scientific research ship

Table S8 Emission factors of the top 25 VOC species (mg kg<sup>-1</sup> fuel)

| Species                 | CCS Main-diesel<br>Mean±SD | Species                    | CCS Main-HFO<br>Mean±SD | Species                    | CCS Auxiliary-diesel<br>Mean±SD     | Species                    | ICS Main-diesel<br>Mean±SD   |
|-------------------------|----------------------------|----------------------------|-------------------------|----------------------------|-------------------------------------|----------------------------|------------------------------|
| Acrolein                | 164±175                    | Acetone                    | 510±134                 | n-Dodecane                 | 50.7±9.43                           | Acetone                    | 469±806                      |
| Propene                 | 154±132                    | Benzene                    | 194±38.5                | n-Undecane                 | 43.9±6.43                           | Propene                    | 69.3±68.1                    |
| Acetone                 | 108±96.8                   | Toluene                    | 179±40.2                | n-Decane                   | 41.8±5.21                           | Acrolein                   | 62.7±86.89                   |
| Butene                  | 108±96.3                   | Propene                    | 122±7.79                | n-Nonane                   | 41.5±5.66                           | Benzene                    | 62.2±53.2                    |
| Benzene                 | 90.2±67.3                  | m/p-xylene                 | 101±16.5                | n-Heptane                  | 36.1±3.40                           | n-Decane                   | 24.6±20.3                    |
| n-Dodecane              | 86.0±110                   | Acrolein                   | 93.9±2.92               | <i>n-Butane</i>            | 30.5±41.0                           | Naphthalene                | 24.5±30.8                    |
| n-Undecane              | 79.6±89.0                  | n-Heptane                  | 91.2±27.6               | Acetone                    | 30.0±11.1                           | n-Undecane                 | 22.3±16.7                    |
| n-Decane                | 60.6±57.8                  | Butene                     | 72.0±4.56               | Methyl Cyclohexane         | 27.6±2.83                           | Butene                     | 20.1±21.1                    |
| Toluene                 | 52.2±50.0                  | n-Nonane                   | 55.5±4.54               | Naphthalene                | 25.1±10.3                           | n-Dodecane                 | 18.3±12.2                    |
| Hexene                  | 47.2±43.4                  | Hexene                     | 47.9±8.43               | Acrolein                   | 19.1±1.19                           | 1,2,4-Trimethyl<br>Benzene | 17.4±18.9                    |
| Pentene                 | 45.0±40.4                  | Methyl Cyclohexane         | 43.9±15.7               | m/p-xylene                 | 18.0±2.32                           | Toluene                    | 16.2±14.4                    |
| Cis-2-Pentene           | 44.7±40.4                  | n-Decane                   | 42.5±5.82               | 1,3,5-Trimethyl<br>Benzene | 17.4±2.20                           | Methyl Ethyl<br>Ketone     | 15.7±18.2                    |
| Isobutane               | 43.1±50.4                  | Naphthalene                | 42.5±1.24               | Toluene                    | 16.5±1.60                           | n-Nonane                   | 13.8±12.8                    |
| 2-Methyl Hexane         | 36.9±NA.                   | o-Xylene                   | 37.1±6.37               | 1,2,4-Trimethyl<br>Benzene | 16.26±2.20                          | m/p-xylene                 | 10.4±10.0                    |
| n-Heptane               | 36±57.5                    | Ethyl Benzene              | 35.9±5.44               | Butene                     | 14.03±5.87                          | Pentene                    | 10.1±10.4                    |
| n-Nonane                | 35.4±31.1                  | Isopentane                 | 33.3±13.5               | Propene                    | 13.8±1.29                           | m-Ethyl Toluene            | 9.69±9.71                    |
| m/p-xylene              | 33.2±31.9                  | Methyl Ethyl Ketone        | 33.0±8.04               | 2-Methyl Hexane            | 13.0±1.19                           | Hexene                     | 8.84±9.23                    |
| Naphthalene             | 26.2±20.4                  | n-Pentane                  | 30.8±11.9               | Benzene                    | 12.8±1.07                           | o-Xylene                   | 6.15±5.09                    |
| 1,3,5-Trimethyl Benzene | 26.1±22.1                  | 1,3,5-Trimethyl<br>Benzene | 30.6±5.43               | 3-Methyl Heptane           | 10.8±1.04                           | Propane                    | 5.30±7.95                    |
| Methyl Cyclohexane      | 24.5±34.4                  | Pentene                    | 29.7±1.90               | n-Pentane                  | 10.1±10.3                           | p-Ethyl Toluene            | 5.22±5.17                    |
| Methyl Ethyl Ketone     | 23.8±25.2                  | Isobutane                  | 27.6±1.95               | Isopentane                 | 9.85±7.74                           | 1,2,3-Trimethyl<br>Benzene | 5.02±5.30                    |
| p-Diethyl Benzene       | 21.9±25.2                  | n-Undecane                 | 27.4±8.55               | Isobutane                  | 9.44±3.83                           | Ethyl Benzene              | 4.93±4.45                    |
| Isopentane              | 20.4±15.9                  | n-Hexane                   | 26.9±9.96               | p-Diethyl Benzene          | 8.48±0.96                           | n-Octane                   | 4.57±3.57                    |
| 1,2,4-Trimethyl Benzene | 18.8±15.6                  | 2-Methyl Hexane            | 26.5±9.03               | o-Xylene                   | 7.98±1.05                           | 1,3,5-Trimethyl<br>Benzene | 4.34±4.39                    |
| m-Ethyl Toluene         | 14.9±12.4                  | 1,2,4-Trimethyl<br>Benzene | 24.7±4.49               | m-Ethyl Toluene            | 7.74±1.07                           | o-Ethyl Toluene            | 4.18±4.09                    |
| Species                 | OGV Main-diesel<br>Mean±SD | Species                    | OGV Main-HFO<br>Mean±SD | Species                    | OGV Auxiliary-<br>diesel<br>Mean±SD | Species                    | OGV Auxiliary-HFO<br>Mean±SD |

|                         |           |                         |           |                         |           |                         |           |
|-------------------------|-----------|-------------------------|-----------|-------------------------|-----------|-------------------------|-----------|
| Naphthalene             | 317±593   | Naphthalene             | 198±281   | Naphthalene             | 117±193   | Naphthalene             | 68.9±49.6 |
| Acetone                 | 292±267   | Acetone                 | 111±104   | Acetone                 | 48.2±51.9 | Acetone                 | 61.5±49.4 |
| 1,3-Butadiene           | 28.7±35.9 | Acrolein                | 19.7±17.7 | n-Dodecane              | 19.4±16.0 | Acrolein                | 16.8±16.7 |
| Acrolein                | 24.7±21.2 | Propene                 | 14.3±13.4 | Acrolein                | 14.5±19.7 | m/p-xylene              | 12.0±11.2 |
| n-Dodecane              | 16.6±13.5 | Toluene                 | 14.0±26.5 | Propene                 | 13.3±14.0 | Propene                 | 10.9±10.2 |
| n-Undecane              | 13.1±11.0 | m/p-xylene              | 11.5±8.15 | m/p-xylene              | 12.7±13.1 | o-Xylene                | 7.51±7.34 |
| n-Decane                | 13.0±5.80 | 1,3-Butadiene           | 9.57±14.4 | n-Undecane              | 12.3±12.2 | Benzene                 | 7.31±4.14 |
| Propene                 | 12.2±7.05 | n-Nonane                | 9.04±14.8 | n-Decane                | 10.3±14.9 | Ethylene                | 5.86±8.36 |
| Benzene                 | 11.8±7.13 | n-Decane                | 8.84±11.7 | n-Nonane                | 8.25±13.5 | 1,2,4-Trimethyl Benzene | 5.33±4.61 |
| m/p-xylene              | 10.5±6.35 | Benzene                 | 8.12±5.14 | o-Xylene                | 7.68±8.07 | Ethyl Benzene           | 5.25±5.13 |
| n-Nonane                | 10.0±4.87 | o-Xylene                | 6.86±4.63 | 1,2,4-Trimethyl Benzene | 7.64±10.9 | Toluene                 | 4.88±4.09 |
| 1,2,4-Trimethyl Benzene | 7.32±2.16 | n-Dodecane              | 6.64±5.91 | Ethylene                | 6.46±5.42 | n-Dodecane              | 4.43±4.87 |
| Methyl Chloride         | 7.16±5.22 | 1,2,4-Trimethyl Benzene | 6.61±6.03 | Benzene                 | 4.88±4.19 | 1,4-Dioxane             | 4.18±4.21 |
| o-Xylene                | 6.20±3.95 | n-Undecane              | 6.21±5.59 | Ethyl Benzene           | 4.36±3.4  | n-Nonane                | 3.74±8.67 |
| Toluene                 | 5.18±2.70 | n-Octane                | 4.52±6.95 | Toluene                 | 3.77±3.91 | n-Decane                | 3.37±7.09 |
| Methyl Ethyl Ketone     | 4.89±4.56 | Ethyl Benzene           | 4.40±1.89 | m-Ethyl Toluene         | 3.32±6.09 | n-Undecane              | 3.17±3.96 |
| n-Octane                | 4.20±3.12 | Butene                  | 3.62±2.17 | n-Octane                | 2.91±5.38 | Butene                  | 2.79±2.92 |
| Tetrahydrofuran         | 4.02±4.66 | Methyl Cyclohexane      | 3.39±4.85 | Pentene                 | 2.56±4.53 | n-Octane                | 2.38±4.76 |
| m-Ethyl Toluene         | 3.60±1.26 | m-Ethyl Toluene         | 3.38±3.42 | Hexene                  | 2.38±4.23 | m-Ethyl Toluene         | 2.27±1.95 |
| Methyl Cyclohexane      | 3.51±2.34 | Ethylene                | 3.20±3.49 | Methyl Isobutyl Ketone  | 2.22±3.85 | Tetrahydrofuran         | 1.78±1.24 |
| Cyclohexane             | 3.39±5.88 | Methyl Ethyl Ketone     | 3.20±2.73 | Methyl Cyclohexane      | 2.13±3.89 | Bromoform               | 1.76±3.52 |
| Methyl Isobutyl Ketone  | 3.38±4.77 | Methyl Chloride         | 3.20±7.89 | o-Ethyl Toluene         | 2.13±3.92 | 1,2,3-Trimethyl Benzene | 1.75±1.98 |
| Ethyl Benzene           | 3.23±1.92 | Hexene                  | 2.86±4.83 | 1,4-Dioxane             | 2.01±1.16 | Pentene                 | 1.54±2.47 |
| 1,2,3-Trimethyl Benzene | 2.45±NA.  | Pentene                 | 2.82±3.77 | 1,2,4-Trichlorobenzene  | 1.92±3.10 | Methyl Cyclohexane      | 1.54±3.08 |
| Dichloromethane         | 2.06±2.59 | Methyl Isobutyl Ketone  | 2.79±3.68 | Butene                  | 1.73±1.50 | o-Ethyl Toluene         | 1.41±1.33 |

45

46

47

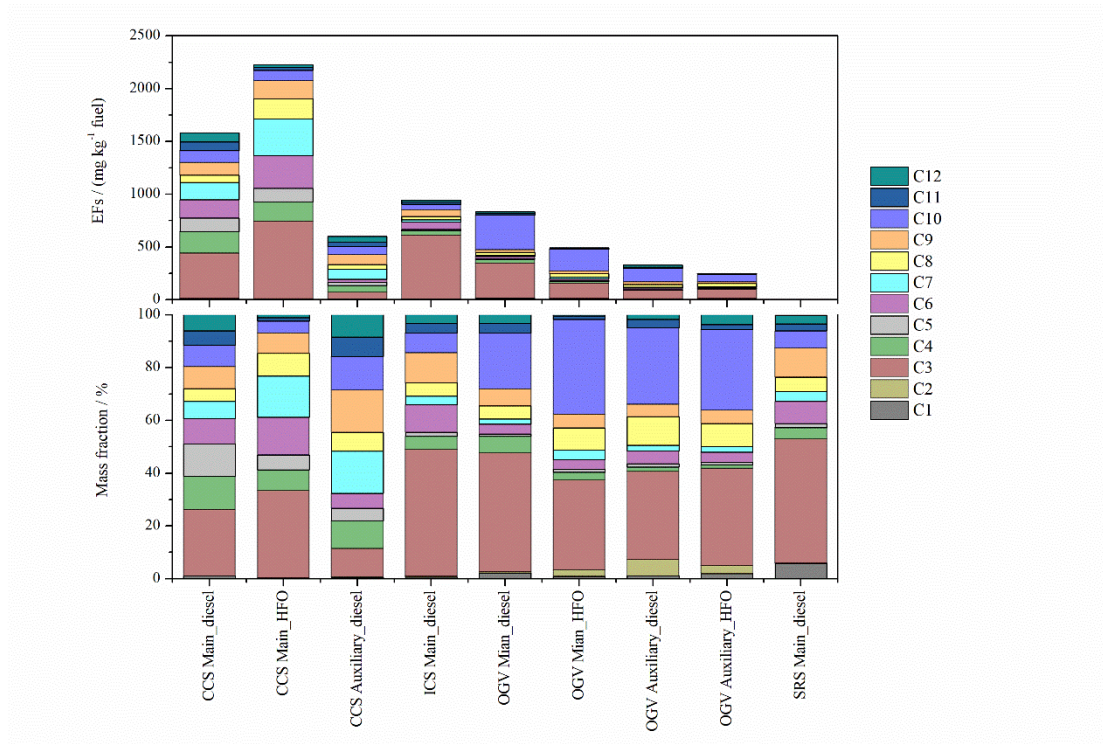

48

49 Figure S5 EFs and mass fractions of VOCs grouping based on carbon number

50

51 Table S9 Diagnostic ratios of VOCs from ship emissions

| Vessel type/fuel     | Toluene<br>/Benzene | Ethylbenzene/m,p-<br>Xylene | Isobutane/n-<br>Butane | Isopentane/n-<br>Pentane |
|----------------------|---------------------|-----------------------------|------------------------|--------------------------|
| CCS Main_diesel      | 0.72±0.41           | 0.38±0.05                   | 1.7n.d..00             | 0.93±0.07                |
| CCS Main_HFO         | 0.9n.d..02          | 0.35±0.00                   | 2.09±1.06              | 1.08±0.02                |
| CCS Auxiliary_diesel | 1.28±0.02           | 0.32±0.00                   | 2.26±2.91              | 1.24±0.50                |
| ICS Main_diesel      | 0.29±0.09           | 0.49±0.07                   | 0.67±0.18              | 1.09±0.22                |
| OGV Mian_diesel      | 0.48±0.19           | 0.31±0.02                   | 0.4n.d..00             | -                        |
| OGV Mian_HFO         | 0.83±0.41           | 0.46±0.17                   | 0.33±0.03              | 0.67±0.20                |
| OGV Auxiliary_diesel | 0.73±0.22           | 0.44±0.24                   | 0.6n.d..00             | 0.44±0.63                |
| OGV Auxiliary_HFO    | 0.57±0.27           | 0.48±0.16                   | 0.34±0.00              | 0.87±0.00                |

52

53

Table S10 The  $R_{O_3}$ ,  $R_{SOA}$ , OFP and SOAFP in this study and previous studies

| Vessel type/fuel                           | Sulfur content (% m/m) | $R_{O_3}$ (g $O_3$ g <sup>-1</sup> VOCs) | OFP (g $O_3$ kg <sup>-1</sup> fuel) | $R_{SOA, High NOx}$ (mg SOA g <sup>-1</sup> VOCs) | $R_{SOA, Low NOx}$ (mg SOA g <sup>-1</sup> VOCs) | SOAFP, High NOx (mg SOA kg <sup>-1</sup> fuel) | SOAFP, Low NOx (mg SOA kg <sup>-1</sup> fuel) | Sources              |
|--------------------------------------------|------------------------|------------------------------------------|-------------------------------------|---------------------------------------------------|--------------------------------------------------|------------------------------------------------|-----------------------------------------------|----------------------|
| CCS Main_diesel                            | N.D.                   | 4.60                                     | 7.44                                | 81.8                                              | 141                                              | 121                                            | 201                                           | This study           |
| CCS Main_HFO                               | 0.39                   | 3.54                                     | 7.81                                | 63.2                                              | 137                                              | 140                                            | 303                                           | This study           |
| CCS Auxiliary_diesel                       | N.D.                   | 3.00                                     | 1.80                                | 99.2                                              | 174                                              | 59.6                                           | 104                                           | This study           |
| ICS Main_diesel                            | N.D.                   | 3.43                                     | 2.66                                | 77.1                                              | 144                                              | 49.7                                           | 91.8                                          | This study           |
| OGV Mian_diesel                            | 0.02-0.05              | 2.95                                     | 2.14                                | 96.2                                              | 219                                              | 101                                            | 262                                           | This study           |
| OGV Mian_HFO                               | 0.43-0.50              | 3.72                                     | 1.56                                | 114                                               | 312                                              | 80.0                                           | 196                                           | This study           |
| OGV Auxiliary_diesel                       | 0.02-0.05              | 3.67                                     | 1.15                                | 134                                               | 294                                              | 47.7                                           | 116                                           | This study           |
| OGV Auxiliary_HFO                          | 0.43-0.50              | 3.55                                     | 0.91                                | 113                                               | 303                                              | 26.5                                           | 71.5                                          | This study           |
| Vessels at berth/ before IFSP <sup>a</sup> | 1.60-2.90              | 3.19                                     | 0.35                                | 288                                               | 313                                              | 37                                             | 40                                            | (Wu et al., 2020)    |
| Vessels at berth/ after IFSP <sup>a</sup>  | 0.01-1.14              | 5.41                                     | 10.37                               | 73                                                | 105                                              | 96                                             | 137                                           | (Wu et al., 2020)    |
| River vessels/diesel                       | 0.02-0.06              | 5.55                                     | 22.98                               | 37                                                | 69                                               | 165                                            | 322                                           | (Wu et al., 2020)    |
| OGV                                        | 0.38, 1.12             | 4.22                                     | 0.09-2.56                           | 80                                                | 228                                              | 1.05-41.0                                      | 3.40-126                                      | (Huang et al., 2018) |
| Vessels at berth/diesel                    | 0.02-0.3               | 2.63                                     | -                                   | 17                                                | -                                                | -                                              | -                                             | (Xiao et al., 2018)  |
| Inland cargo ship/diesel                   | -                      | ~4.6-5.6 <sup>b</sup>                    | 0.33-0.83                           | -                                                 | ~16-47 <sup>b</sup>                              | -                                              | 2.8-8.9                                       | (Wu et al., 2019)    |
| Container ship/diesel                      | 0.12                   | ~4.5 <sup>b</sup>                        | ~0.8 <sup>b</sup>                   | -                                                 | ~17 <sup>b</sup>                                 | -                                              | ~4.5 <sup>b</sup>                             | (Wu et al., 2019)    |
| Container ship/HFO                         | 2.07                   | ~6.0 <sup>b</sup>                        | ~2.6 <sup>b</sup>                   | -                                                 | ~28 <sup>b</sup>                                 | -                                              | ~8.7 <sup>b</sup>                             | (Wu et al., 2019)    |

54 <sup>a</sup>, IFSP, implementation of the fuel switch policy;55 <sup>b</sup>, the values were estimated according to the bar chart.

56

Table S11 The top 20 contributing VOC species to OFP (%)

| Species                 | CCS Main-diesel<br>Mean±SD | Species                 | CCS Main-HFO<br>Mean±SD | Species                 | CCS Auxiliary-diesel<br>Mean±SD | Species                 | ICS Main-diesel<br>Mean±SD   |
|-------------------------|----------------------------|-------------------------|-------------------------|-------------------------|---------------------------------|-------------------------|------------------------------|
| Propene                 | 21.3±6.52                  | Propene                 | 18.3±1.24               | 1,3,5-Trimethyl Benzene | 11.3±0.19                       | Propene                 | 27.7±11.8                    |
| Acrolein                | 13.4±6.15                  | m/p-xylene              | 10.1±0.32               | Propene                 | 8.94±0.15                       | Acrolein                | 15.1±15.0                    |
| Butene                  | 13.0±3.85                  | Toluene                 | 9.11±0.86               | 1,2,4-Trimethyl Benzene | 8.0n.d..20                      | 1,2,4-Trimethyl Benzene | 7.34±7.75                    |
| 1,3,5-Trimethyl Benzene | 6.08±4.32                  | Acrolein                | 9.03±0.91               | Acrolein                | 7.94±0.38                       | Butene                  | 6.69±3.08                    |
| Cis-2-Pentene           | 5.57±1.69                  | Butene                  | 9.02±0.62               | m/p-xylene              | 7.79±0.14                       | Acetone                 | 5.67±7.82                    |
| m/p-xylene              | 4.64±3.11                  | 1,3,5-Trimethyl Benzene | 4.6±0.21                | Butene                  | 7.46±2.35                       | m/p-xylene              | 3.87±3.57                    |
| Pentene                 | 3.88±1.19                  | o-Xylene                | 3.62±0.15               | Naphthalene             | 4.57±1.4                        | m-Ethyl Toluene         | 3.31±3.29                    |
| Toluene                 | 3.19±1.99                  | Hexene                  | 3.36±0.15               | Toluene                 | 3.66±0.05                       | Naphthalene             | 3.12±1.83                    |
| Hexene                  | 3.13±0.85                  | Cis-2-Pentene           | 2.81±1.9                | o-Xylene                | 3.39±0.07                       | 1,2,3-Trimethyl Benzene | 2.98±3.01                    |
| 1,2,4-Trimethyl Benzene | 3.08±1.85                  | 1,2,4-Trimethyl Benzene | 2.8±0.14                | m-Ethyl Toluene         | 3.17±0.09                       | Toluene                 | 2.93±2.11                    |
| o-Xylene                | 2.11±1.37                  | Pentene                 | 2.76±0.19               | Methyl Cyclohexane      | 2.61±0.02                       | Pentene                 | 2.39±1.05                    |
| m-Ethyl Toluene         | 2.08±1.31                  | Acetone                 | 2.33±0.31               | n-Heptane               | 2.15±0.03                       | 1,3,5-Trimethyl Benzene | 2.39±2.33                    |
| Naphthalene             | 1.98±1.65                  | m-Ethyl Toluene         | 2.27±0.11               | <i>n-Butane</i>         | 2.11±2.85                       | o-Xylene                | 2.24±1.75                    |
| p-Diethyl Benzene       | 1.57±0.94                  | Naphthalene             | 1.84±0.29               | p-Diethyl Benzene       | 2.09±0.01                       | Benzene                 | 1.87±1.06                    |
| Trans-2-Butene          | 1.48±1.04                  | Benzene                 | 1.78±0.12               | Cis-2-Pentene           | 2.06±0.02                       | Hexene                  | 1.58±0.73                    |
| n-Pentane               | 1.29±2.37                  | Trans-2-Butene          | 1.7±0.22                | n-Nonane                | 1.79±0.05                       | p-Ethyl Toluene         | 1.06±1.04                    |
| Isopentane              | 1.21±1.87                  | Ethyl Benzene           | 1.4±0.03                | n-Decane                | 1.58±0.02                       | o-Ethyl Toluene         | 1.06±0.95                    |
| Isobutane               | 1.13±1.05                  | n-Heptane               | 1.24±0.22               | n-Dodecane              | 1.54±0.12                       | Methyl Ethyl Ketone     | 0.96±0.62                    |
| Benzene                 | 0.85±0.39                  | Trans-2-Pentene         | 1.06±0.18               | n-Undecane              | 1.49±0.05                       | Ethylene                | 0.92±2.75                    |
| n-Dodecane              | 0.8±0.59                   | Methyl Cyclohexane      | 0.94±0.22               | Pentene                 | 1.43±0.01                       | n-Decane                | 0.87±0.67                    |
| Species                 | OGV Main-diesel<br>Mean±SD | Species                 | OGV Main-HFO<br>Mean±SD | Species                 | OGV Auxiliary-diesel<br>Mean±SD | Species                 | OGV Auxiliary-HFO<br>Mean±SD |
| Naphthalene             | 24.6±33.8                  | Naphthalene             | 32.3±20.01              | Naphthalene             | 23.1±13.4                       | Naphthalene             | 31.3±28.9                    |
| 1,3-Butadiene           | 14.5±21.8                  | Propene                 | 11.9±6.73               | Propene                 | 16.1±7.38                       | Propene                 | 11.4±8.14                    |
| Acrolein                | 9.86±1.61                  | Acrolein                | 10.0±6.57               | m/p-xylene              | 11.2±5.86                       | Acrolein                | 11.3±7.62                    |
| Propene                 | 9.74±7.13                  | m/p-xylene              | 8.68±8.75               | Ethylene                | 10.6±11.4                       | m/p-xylene              | 9.52±5.70                    |
| Acetone                 | 7.64±9.25                  | o-Xylene                | 5.38±5.94               | Acrolein                | 8.25±5.92                       | Acetone                 | 6.76±12.8                    |

|                         |           |                         |           |                         |            |                         |           |
|-------------------------|-----------|-------------------------|-----------|-------------------------|------------|-------------------------|-----------|
| m/p-xylene              | 6.64±5.64 | 1,2,4-Trimethyl Benzene | 4.16±2.07 | o-Xylene                | 6.58±3.72  | o-Xylene                | 5.88±3.92 |
| 1,2,4-Trimethyl Benzene | 5.43±3.28 | Toluene                 | 4.09±7.97 | 1,2,4-Trimethyl Benzene | 5.22±1.03  | 1,2,4-Trimethyl Benzene | 4.63±2.2  |
| o-Xylene                | 3.73±2.97 | 1,3-Butadiene           | 3.67±9.52 | Butene                  | 2.83±3.28  | Ethylene                | 3.36±4.35 |
| m-Ethyl Toluene         | 2.11±1.19 | Ethylene                | 3.26±4.68 | Acetone                 | 1.93±1.15  | Butene                  | 2.60±2.05 |
| Butene                  | 1.90±3.80 | Butene                  | 2.81±2.82 | Ethyl Benzene           | 1.75±0.81  | Toluene                 | 1.99±0.74 |
| Toluene                 | 1.82±1.52 | Acetone                 | 2.77±2.47 | Toluene                 | 1.59±0.55  | Ethyl Benzene           | 1.62±0.90 |
| 1,2,3-Trimethyl Benzene | 1.01±2.02 | m-Ethyl Toluene         | 1.50±1.12 | n-Dodecane              | 1.47±1.60  | m-Ethyl Toluene         | 1.47±0.95 |
| Benzene                 | 0.96±1.20 | Ethyl Benzene           | 1.46±1.30 | m-Ethyl Toluene         | 1.06±1.32  | 1,2,3-Trimethyl Benzene | 1.45±1.58 |
| Pentene                 | 0.95±1.21 | Pentene                 | 1.14±0.90 | Pentene                 | 0.90±1.05  | Pentene                 | 0.93±1.34 |
| 1,3,5-Trimethyl Benzene | 0.81±1.62 | 1,3,5-Trimethyl Benzene | 0.73±0.82 | 1,3,5-Trimethyl Benzene | 0.86±1.01  | 1,3,5-Trimethyl Benzene | 0.88±0.88 |
| Ethyl Benzene           | 0.81±0.67 | 1,2,3-Trimethyl Benzene | 0.68±0.97 | n-Undecane              | 0.84±0.81  | Benzene                 | 0.68±0.29 |
| n-Dodecane              | 0.71±1.02 | Hexene                  | 0.65±0.88 | Trans-2-Butene          | 0.7n.d..89 | o-Ethyl Toluene         | 0.66±0.50 |
| n-Nonane                | 0.67±0.63 | Benzene                 | 0.48±0.24 | Hexene                  | 0.64±0.74  | Hexene                  | 0.59±0.98 |
| n-Undecane              | 0.66±1.00 | o-Ethyl Toluene         | 0.46±0.55 | 1,2,3-Trimethyl Benzene | 0.57±1.14  | Trans-2-Butene          | 0.47±0.77 |
| Hexene                  | 0.65±1.31 | Methyl Isobutyl Ketone  | 0.40±1.01 | o-Ethyl Toluene         | 0.52±0.64  | n-Dodecane              | 0.35±0.42 |

58

59

Table S12 The top 20 contributing VOC species to SOAFP (%)

| Species                 | CCS Main-diesel<br>Mean±SD | Species                    | CCS Main-HFO<br>Mean±SD | Species                    | CCS Auxiliary-diesel<br>Mean±SD     | Species                    | ICS Main-diesel<br>Mean±SD   |
|-------------------------|----------------------------|----------------------------|-------------------------|----------------------------|-------------------------------------|----------------------------|------------------------------|
| Benzene                 | 15.7±8.53                  | Benzene                    | 24.n.d..71              | Naphthalene                | 17.3±4.01                           | Benzene                    | 24.6±11.8                    |
| n-Dodecane              | 15.4±7.82                  | Toluene                    | 18.1±1.02               | n-Dodecane                 | 17.n.d..02                          | Naphthalene                | 17.7±10.9                    |
| Naphthalene             | 11.9±4.78                  | m/p-xylene                 | 12.4±0.08               | n-Undecane                 | 11.5±0.47                           | n-Dodecane                 | 8.74±4.65                    |
| n-Undecane              | 10.9±4.11                  | Naphthalene                | 10.6±2.10               | m/p-xylene                 | 6.34±0.37                           | n-Undecane                 | 8.50±7.23                    |
| Toluene                 | 7.60±4.07                  | co-Xylene                  | 4.52±0.01               | 1,3,5-Trimethyl<br>Benzene | 6.11±0.37                           | 1,2,4-Trimethyl<br>Benzene | 6.47±5.26                    |
| m/p-xylene              | 6.29±2.91                  | Ethyl Benzene              | 4.38±0.08               | n-Decane                   | 5.92±0.37                           | Toluene                    | 5.67±3.17                    |
| 1,3,5-Trimethyl Benzene | 5.46±1.4                   | 1,3,5-Trimethyl<br>Benzene | 3.73±0.03               | 1,2,4-Trimethyl<br>Benzene | 5.72±0.30                           | m/p-xylene                 | 4.51±3.87                    |
| n-Decane                | 4.47±1.04                  | 1,2,4-Trimethyl<br>Benzene | 3.01±0.04               | Toluene                    | 4.85±0.44                           | n-Decane                   | 4.42±2.56                    |
| p-Diethyl Benzene       | 4.04±1.54                  | m-Ethyl Toluene            | 2.93±0.03               | Benzene                    | 4.6n.d..48                          | m-Ethyl Toluene            | 3.53±2.67                    |
| 1,2,4-Trimethyl Benzene | 3.71±0.61                  | n-Dodecane                 | 2.88±0.05               | n-Nonane                   | 3.25±0.17                           | o-Xylene                   | 2.57±1.89                    |
| m-Ethyl Toluene         | 3.01±0.53                  | n-Undecane                 | 2.45±0.36               | p-Diethyl Benzene          | 2.99±0.22                           | Ethyl Benzene              | 2.08±1.66                    |
| o-Xylene                | 2.9n.d..9                  | n-Decane                   | 2.09±0.07               | o-Xylene                   | 2.81±0.16                           | 1,2,3-Trimethyl<br>Benzene | 1.97±1.51                    |
| Ethyl Benzene           | 2.33±0.92                  | p-Ethyl Toluene            | 1.72±0.03               | m-Ethyl Toluene            | 2.72±0.14                           | p-Ethyl Toluene            | 1.89±1.41                    |
| o-Ethyl Toluene         | 1.45±0.22                  | n-Nonane                   | 1.52±0.13               | Ethyl Benzene              | 2.02±0.14                           | 1,3,5-Trimethyl<br>Benzene | 1.61±1.17                    |
| n-Nonane                | 1.37±0.51                  | p-Diethyl Benzene          | 1.46±0.05               | o-Ethyl Toluene            | 1.57±0.08                           | o-Ethyl Toluene            | 1.52±0.99                    |
| n-Propyl Benzene        | 1.14±0.12                  | o-Ethyl Toluene            | 1.27±0.02               | p-Ethyl Toluene            | 1.34±0.07                           | n-Propyl<br>Benzene        | 1.34±0.73                    |
| p-Ethyl Toluene         | 1.02±0.69                  | n-Propyl Benzene           | 1.0n.d..01              | n-Propyl Benzene           | 1.08±0.04                           | n-Nonane                   | 1.18±0.54                    |
| m-Diethyl Benzene       | 0.45±0.35                  | Methyl Cyclohexane         | 0.58±0.11               | Methyl Cyclohexane         | 1.07±0.09                           | m-Diethyl<br>Benzene       | 0.83±0.55                    |
| Isopropyl Benzene       | 0.29±0.22                  | Isopropyl Benzene          | 0.49±0.01               | Isopropyl Benzene          | 0.58±0.00                           | Isopropyl<br>Benzene       | 0.48±0.32                    |
| Methyl Cyclohexane      | 0.29±0.47                  | n-Heptane                  | 0.27±0.04               | m-Diethyl Benzene          | 0.58±0.01                           | n-Octane                   | 0.21±0.12                    |
| Species                 | OGV Main-diesel<br>Mean±SD | Species                    | OGV Main-HFO<br>Mean±SD | Species                    | OGV Auxiliary-<br>diesel<br>Mean±SD | Species                    | OGV Auxiliary-HFO<br>Mean±SD |
| Naphthalene             | 48.0±33.8                  | Naphthalene                | 72.1±16.3               | Naphthalene                | 57.7±21.5                           | Naphthalene                | 64.4±21.9                    |
| Benzene                 | 10.4±12.7                  | m/p-xylene                 | 6.16±6.30               | n-Dodecane                 | 13.2±16.0                           | m/p-xylene                 | 7.72±5.63                    |
| m/p-xylene              | 7.30±7.03                  | o-Xylene                   | 3.87±4.22               | m/p-xylene                 | 6.57±3.54                           | Benzene                    | 5.31±3.96                    |
| n-Dodecane              | 6.99±8.82                  | Benzene                    | 3.53±2.57               | n-Undecane                 | 4.95±5.06                           | o-Xylene                   | 4.87±3.70                    |



|                         |           |                         |            |                         |            |                         |            |
|-------------------------|-----------|-------------------------|------------|-------------------------|------------|-------------------------|------------|
| n-Undecane              | 4.61±5.97 | Toluene                 | 3.48±4.70  | o-Xylene                | 3.95±2.30  | 1,2,4-Trimethyl Benzene | 3.31±2.45  |
| 1,2,4-Trimethyl Benzene | 4.50±2.91 | Ethyl Benzene           | 2.62±2.55  | Benzene                 | 2.88±1.62  | Ethyl Benzene           | 3.17±2.20  |
| o-Xylene                | 4.23±4.06 | 1,2,4-Trimethyl Benzene | 2.35±1.52  | Ethyl Benzene           | 2.71±1.38  | Toluene                 | 2.52±1.64  |
| Toluene                 | 3.15±2.88 | n-Dodecane              | 1.45±1.82  | 1,2,4-Trimethyl Benzene | 2.61±0.28  | n-Dodecane              | 2.23±2.73  |
| Ethyl Benzene           | 2.27±2.15 | n-Undecane              | 1.07±1.10  | Toluene                 | 1.59±0.85  | n-Undecane              | 1.35±2.05  |
| m-Ethyl Toluene         | 2.19±1.61 | m-Ethyl Toluene         | 0.92±0.81  | n-Decane                | 1.36±1.09  | m-Ethyl Toluene         | 1.18±1.33  |
| n-Decane                | 2.00±2.20 | n-Decane                | 0.77±1.18  | m-Ethyl Toluene         | 0.55±0.64  | n-Decane                | 0.93±2.08  |
| n-Nonane                | 1.56±1.54 | n-Nonane                | 0.44±0.84  | n-Nonane                | 0.45±0.30  | o-Ethyl Toluene         | 0.75±0.90  |
| o-Ethyl Toluene         | 0.79±1.09 | o-Ethyl Toluene         | 0.3n.d..42 | o-Ethyl Toluene         | 0.36±0.41  | 1,2,3-Trimethyl Benzene | 0.6n.d..81 |
| 1,2,3-Trimethyl Benzene | 0.42±0.83 | p-Ethyl Toluene         | 0.23±0.31  | 1,3,5-Trimethyl Benzene | 0.31±0.38  | n-Nonane                | 0.59±1.40  |
| n-Octane                | 0.41±0.47 | 1,3,5-Trimethyl Benzene | 0.22±0.29  | p-Ethyl Toluene         | 0.25±0.30  | 1,3,5-Trimethyl Benzene | 0.47±0.71  |
| 1,3,5-Trimethyl Benzene | 0.34±0.68 | 1,2,3-Trimethyl Benzene | 0.21±0.33  | 1,2,3-Trimethyl Benzene | 0.23±0.47  | p-Ethyl Toluene         | 0.31±0.34  |
| Methyl Cyclohexane      | 0.28±0.30 | n-Propyl Benzene        | 0.14±0.23  | n-Propyl Benzene        | 0.2n.d..23 | n-Octane                | 0.13±0.32  |
| p-Ethyl Toluene         | 0.24±0.48 | n-Octane                | 0.1n.d..20 | n-Octane                | 0.05±0.06  | Methyl Cyclohexane      | 0.08±0.20  |
| n-Propyl Benzene        | 0.13±0.25 | Methyl Cyclohexane      | 0.06±0.14  | Methyl Cyclohexane      | 0.04±0.05  | n-Propyl Benzene        | 0.05±0.08  |
| m-Diethyl Benzene       | 0.11±0.22 | Isopropyl Benzene       | 0.01±0.02  | Cyclohexane             | 0.01±0.02  | n-Heptane               | 0.01±0.02  |

---

## REFERENCES

62  
63 Chan, A. W. H., Kautzman, K. E., Chhabra, P. S., Surratt, J. D., Chan, M. N.,  
64 Crounse, J. D., Kuerten, A., Wennberg, P. O., Flagan, R. C., and Seinfeld, J. H.:  
65 Secondary organic aerosol formation from photooxidation of naphthalene and  
66 alkylnaphthalenes: implications for oxidation of intermediate volatility organic  
67 compounds (IVOCs), *Atmos. Chem. Phys.*, 9, 3049-3060, 2009.

68 Derwent, R. G., Jenkin, M. E., Utembe, S. R., Shallcross, D. E., Murrells, T. P.,  
69 and Passant, N. R.: Secondary organic aerosol formation from a large number of  
70 reactive man-made organic compounds, *Sci. Total Environ.*, 408, 3374-3381,  
71 10.1016/j.scitotenv.2010.04.013, 2010.

72 Grosjean, D.: In situ organic aerosol formation during a smog episode: Estimated  
73 production and chemical functionality, *Atmos. Environ. Part A. General Topics*, 26,  
74 953-963, [https://doi.org/10.1016/0960-1686\(92\)90027-I](https://doi.org/10.1016/0960-1686(92)90027-I), 1992.

75 Huang, C., Hu, Q., Li, Y., Tian, J., Ma, Y., Zhao, Y., Feng, J., An, J., Qiao, L., Wang,  
76 H., Jing, S. a., Huang, D., Lou, S., Zhou, M., Zhu, S., Tao, S., and Li, L.: Intermediate  
77 Volatility Organic Compound Emissions from a Large Cargo Vessel Operated under  
78 Real-World Conditions, *Environ. Sci. Technol.*, 52, 12934-12942,  
79 10.1021/acs.est.8b04418, 2018.

80 Lim, Y. B., and Ziemann, P. J.: Effects of Molecular Structure on Aerosol Yields  
81 from OH Radical-Initiated Reactions of Linear, Branched, and Cyclic Alkanes in the  
82 Presence of NO<sub>x</sub>, *Environ. Sci. Technol.*, 43, 2328-2334, 10.1021/es803389s, 2009.

83 Ng, N. L., Chhabra, P. S., Chan, A. W. H., Surratt, J. D., Kroll, J. H., Kwan, A. J.,  
84 McCabe, D. C., Wennberg, P. O., Sorooshian, A., Murphy, S. M., Dalleska, N. F., Flagan,  
85 R. C., and Seinfeld, J. H.: Effect of NO<sub>x</sub> level on secondary organic aerosol (SOA)  
86 formation from the photooxidation of terpenes, *Atmos. Chem. Phys.*, 7, 5159-5174,  
87 2007.

88 Wu, D., Ding, X., Li, Q., Sun, J. F., Huang, C., Yao, L., Wang, X. M., Ye, X. N.,  
89 Chen, Y. J., He, H., and Chen, J. M.: Pollutants emitted from typical Chinese vessels:  
90 Potential contributions to ozone and secondary organic aerosols, *Journal of Cleaner*  
91 *Production*, 238, 9, 10.1016/j.jclepro.2019.117862, 2019.

92 Wu, Z., Zhang, Y., He, J., Chen, H., Huang, X., Wang, Y., Yu, X., Yang, W., Zhang,  
93 R., Zhu, M., Li, S., Fang, H., Zhang, Z., and Wang, X.: Dramatic increase in reactive  
94 volatile organic compound (VOC) emissions from ships at berth after implementing the  
95 fuel switch policy in the Pearl River Delta Emission Control Area, *Atmos. Chem. Phys.*,  
96 20, 1887-1900, 10.5194/acp-20-1887-2020, 2020.

97 Xiao, Q., Li, M., Liu, H., Fu, M., Deng, F., Lv, Z., Man, H., Jin, X., Liu, S., and  
98 He, K.: Characteristics of marine shipping emissions at berth: profiles for particulate  
99 matter and volatile organic compounds, *Atmos. Chem. Phys.*, 18, 9527-9545,  
100 10.5194/acp-18-9527-2018, 2018.

101

102
